# Supplementary material for: A dark side of conservation biology: protected areas fail in representing subterranean biodiversity
Source: Research Square preprint supplement (doi:10.21203/rs.3.rs-2104256/v1), 2022-09-28

**A dark side of conservation biology: protected areas fail in representing subterranean biodiversity**

Raquel Colado, Pedro Abellán, Susana Pallarés, Stefano Mammola, Roberto Milione, Arnaud Faille, Javier Fresneda & David Sánchez-Fernández

**Supplementary Information**

**Fig. S1** Maps of species richness and rarity index in the Pyrenees (A and C) and Alps (B and D). The colour scale represents values ranging from the lowest (blue) to the highest values (red) of the total number of species (richness) or the rarity index, respectively.


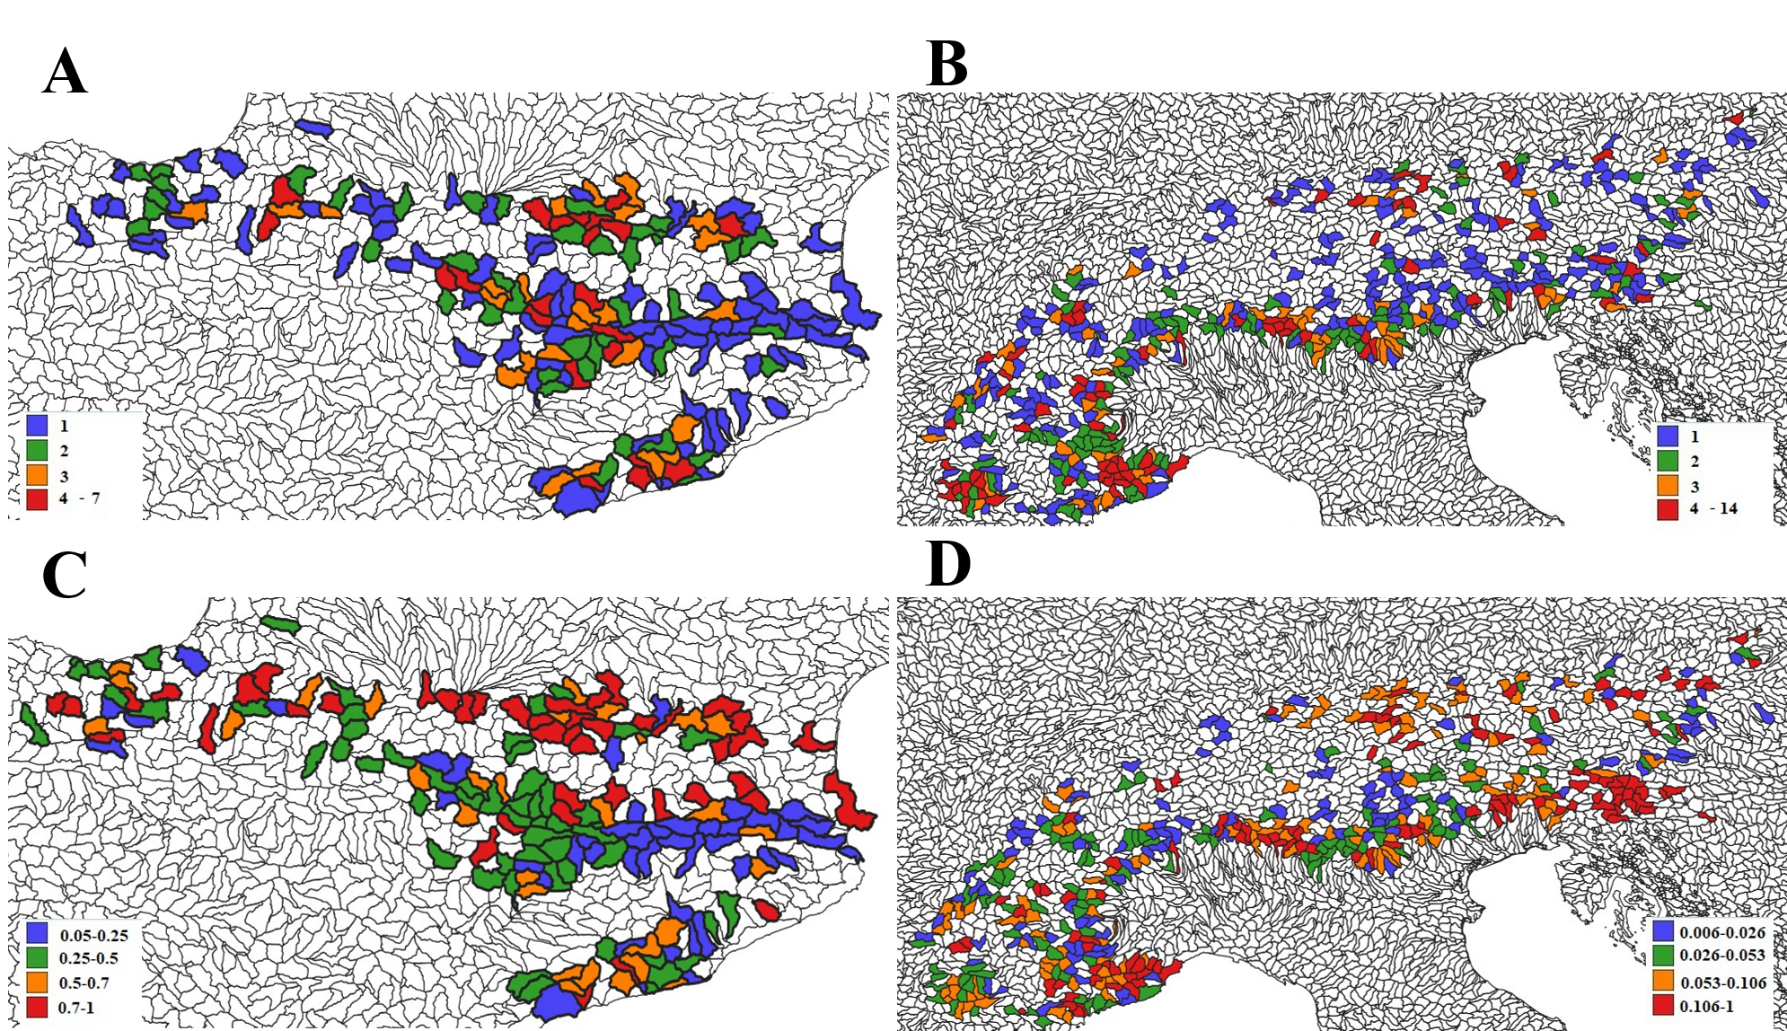

Supplement: Supplementary file 1 [file e28ed3f3310f20d88c9ba038.docx]
